# Supplementary material for: Regulatory Effect of Bacillus subtilis on Cytokines of Dendritic Cells in Grass Carp (Ctenopharyngodon Idella)
Source: MDPI journal article supplement (doi:10.3390/ijms20020389), 2019-01-17
Supplement: s1 [file s1]

# Supplementary Figures

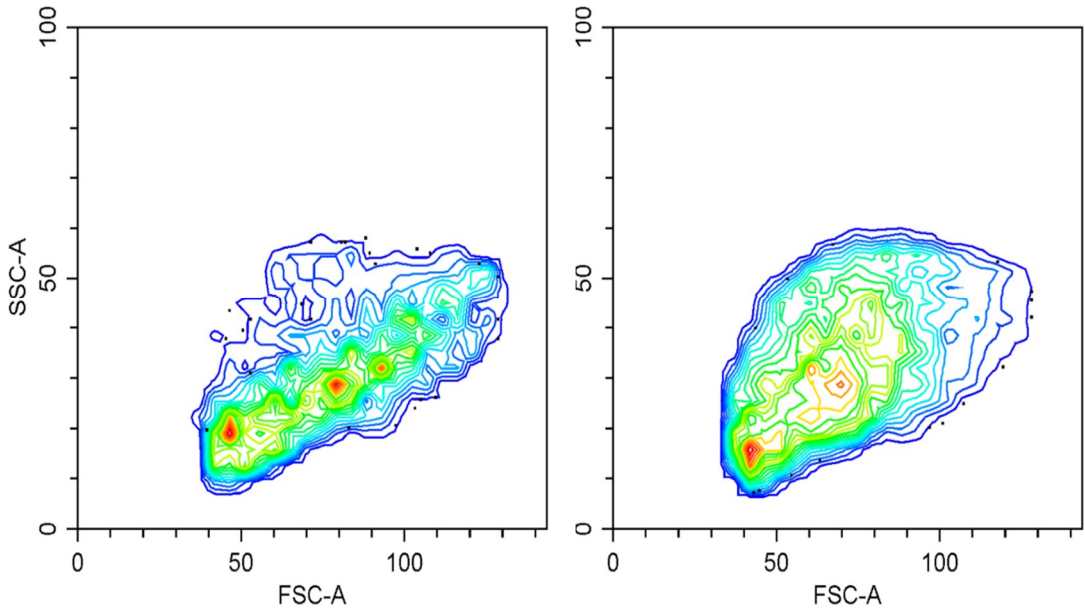

**Supplementary Figure S1 | Flow cytometry forward/side scatter profile of cultured cells before (left panel) and after enrichment (right panel).** Data are representative of three independent experiments. Typical purity after enrichment was more than 80%.

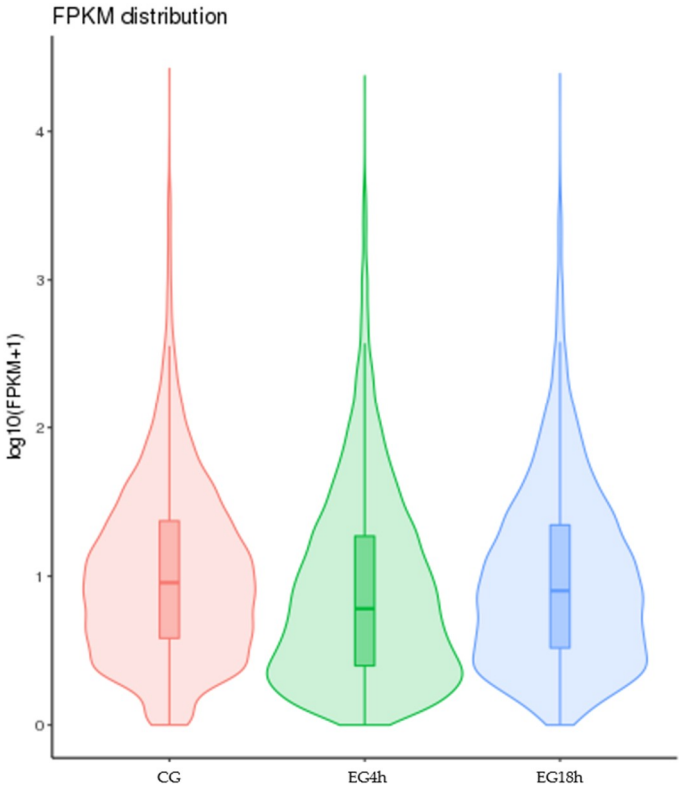

**Supplementary Figure S2 | FPKM density distribution.** The  $\log_{10}(\text{FPKM}+1)$  is used for the Y axis and the sample name is used for the X axis. Volin plots show the lowest and highest values in the distribution, the median, and the lower quartile and the upper quartile of a given set of data. Each group contains three independent samples.

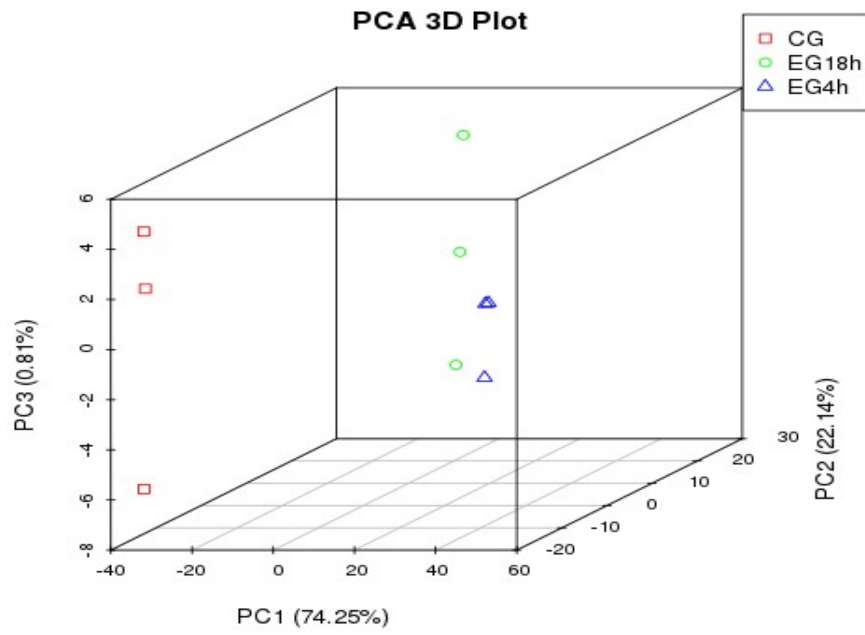

**Supplementary Figure S3 | Principal Component Analysis (PCA) of the transcriptome expressed in CG, EG4h and EG18h.** PCA was carried on all genes under investigation to determine the expression trends within the data set.
